# Supplementary material for: Quantitative analysis of the relationship between the dispersion stability of mixed-surfactant Ag nanoparticles and their composition
Source: Royal Society of Chemistry journal article supplement (doi:10.1039/c5ra03780h), 2015-01-01
Supplement: c5ra03780h1.pdf [file c5ra03780h1.pdf]

# Quantitative analysis of the relationship between the dispersion stability of mixed- surfactant Ag nanoparticles and their composition

Jianwei Jiang,<sup>a</sup> In Seok Hong,<sup>a</sup> Habeebullah Thajudeen,<sup>a</sup> Ying Lu,<sup>a</sup> Sang-Ho Kim,<sup>a</sup> Longhai Piao<sup>a,\*</sup>  
and Sungho Yoon<sup>b,\*</sup>

## Supporting Information

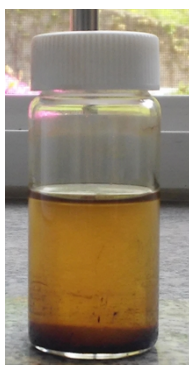

**Fig. S1** Photograph of Ag NPs dispersed in toluene solution without adding surfactants.

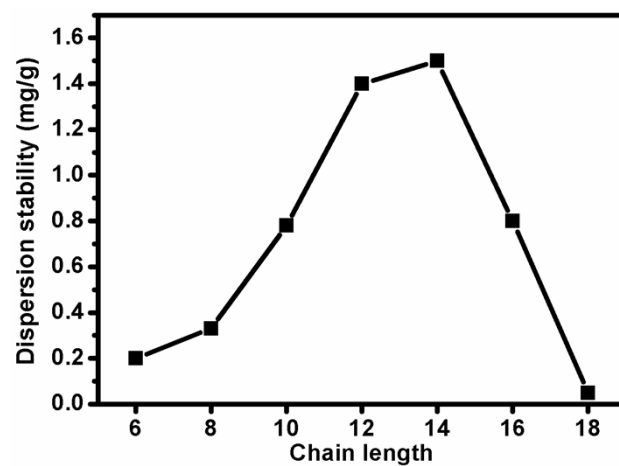

**Fig. S2** Dispersion stabilities of Ag NPs dispersed in 0.1 M toluene solutions of *C6* to *C18*.

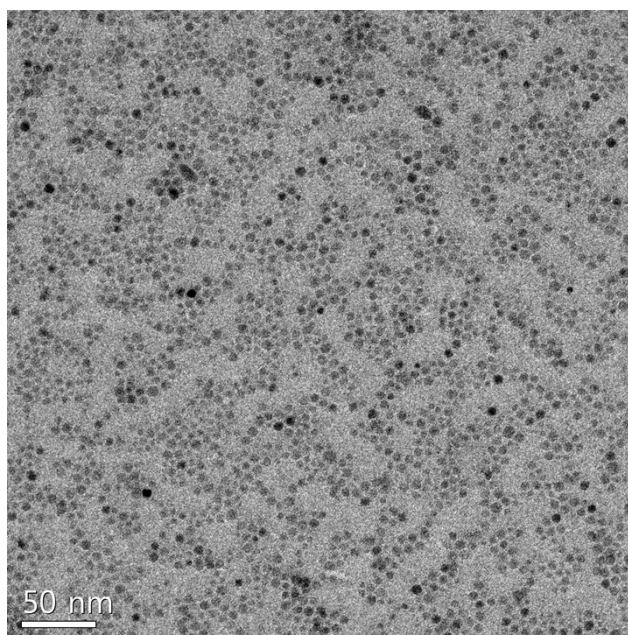

**Fig. S3** TEM image of Ag NPs synthesized by the decomposition of Ag palmitate.

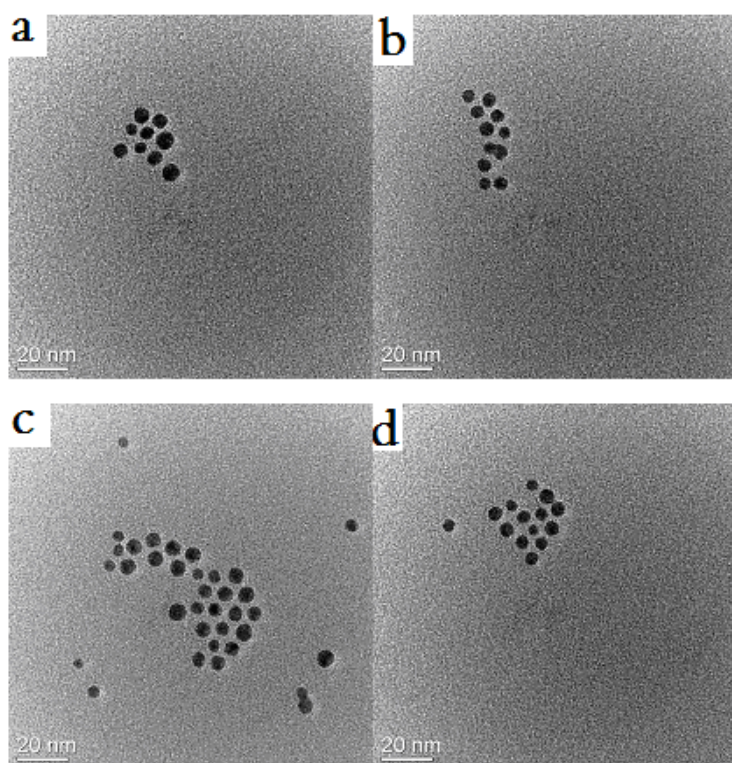

Fig. S4 The TEM images of the Ag NPs before (Fig. S4a and 4b) and after ligand-exchange reaction (Fig. S4c and 4d).

**Table S1** Molar ratio of *C16* on the Ag NP surfaces after the ligand-exchange reaction measured with HPLC.

|                                   | <i>C14/C6</i> | <i>C14/C8</i> | <i>C14/C10</i> | <i>C14/C12</i> | <i>C18/C6</i> | <i>C18/C8</i> | <i>C18/C10</i> | <i>C18/C12</i> | <i>C18/C14</i> |
|-----------------------------------|---------------|---------------|----------------|----------------|---------------|---------------|----------------|----------------|----------------|
| Remained amount of <i>C16</i> (%) | 6.1           | 6.5           | 6.3            | 6.8            | 6.1           | 6.0           | 5.9            | 6.3            | 6.0            |
